# Supplementary material
Source: MDPI journal article supplement (https://www.mdpi.com/1999-4907/7/12/303)
Supplement: s1 [file s1]

Supplementary Materials: Evaluation of Whole Tree Growth Increment Derived from Tree-Ring Series for Use in Assessments of Changes in Forest Productivity across Various Spatial Scales

Juha M. Metsaranta and Jagtar S. Bhatti

**Table S1.** Height–diameter model parameters [1,2].

| **Parameter** | **Manitoba** | | | **All Other Provinces** | | |
| --- | --- | --- | --- | --- | --- | --- |
| **a** | **b** | **c** | **a** | **b** | **c** |
| Jack Pine | 25.4006 | 0.0634 | 1.5326 | 31.4263 | 0.03888 | 1.1279 |
| Lodgepole Pine | - | - | - | 29.0075 | 0.04859 | 1.1782 |
| Black Spruce | 32.1195 | 0.0417 | 1.1089 | 24.5751 | 0.05432 | 1.2243 |
| White Spruce | 38.0155 | 0.0291 | 1.1104 | 32.1261 | 0.04633 | 1.3032 |
| Trembling Aspen | 23.9472 | 0.1238 | 3.1155 | 25.6614 | 0.06834 | 1.1394 |

**Table S2.** National taper model parameters [3].

| **Species** | **DBH** | | | | | | | |
| --- | --- | --- | --- | --- | --- | --- | --- | --- |
| **b0** | **b1** | **b2** | **Di1** | **Dij1** | **Di2** | **Dij2** | **Dijk** |
| White Spruce | 5.7006 | 0.4099 | 2.1581 | 0 | 0.0649 | 0.0452 | 0 | 0.0631 |
| Black Spruce | 15.7745 | 0.15 | 2.2548 | 0.1639 | 0 | 0 | 0.0746 | 0.0816 |
| Jack Pine | 15.5003 | 0.0654 | 2.1485 | 0 | 0.0675 | 0.025 | 0 | 0.0636 |
| Lodgepole Pine | 11.8637 | 0.246 | 2.1264 | 0 | 0.0953 | 0.033 | 0 | 0 |
| Trembling Aspen | 6.7233 | 0.4554 | 2.1583 | 0.2207 | 0 | 0 | 0.0699 | 0.0653 |
| **Species** | **DBH and HT** | | | |
| **b** | **Di2** | **Dij2** | **Dijk** |
| White Spruce | 2.1443 | 0.0351 | 0.0317 | 0.0498 |
| Black Spruce | 2.1788 | 0.049 | 0.0823 | 0.1053 |
| Jack Pine | 2.1413 | 0.0262 | 0 | 0.0636 |
| Lodgepole Pine | 2.1369 | 0.0394 | 0.0422 | 0.0619 |
| Trembling Aspen | 2.1482 | 0.048 | 0.0489 | 0.0672 |

**Table S3.** Regional taper model parameters [1,4–6].

| **Parameter** | **Jack Pine** | | | **Black Spruce** | | |
| --- | --- | --- | --- | --- | --- | --- |
| **Manitoba** | **Saskatchewan** | **Alberta and Northwest Territories** | **Manitoba** | **Saskatchewan** | **Alberta and Northwest Territories** |
| a0 | 0.9674 | 0.738222 | 0.940832 | 0.8894 | 0.933348 | 0.940695 |
| a1 | 0.9746 | 1.080307 | 0.955575 | 1.0163 | 0.993014 | 0.957211 |
| a2 | 0.9976 | 0.994994 | 0.999333 | 0.995 | 0.998033 | 0.99964 |
| b1 | 0.1459 | 0.946525 | 0.116311 | 0.2866 | 1.634033 | 1.395784 |
| b2 | -0.0402 | -0.21528 | -0.028172 | -0.0853 | -0.377332 | -0.344672 |
| b3 | 0.0487 | 1.529815 | -0.384427 | 0.6307 | 2.839266 | 2.835917 |
| b4 | 0.1266 | -0.769171 | 0.304055 | -0.1714 | -1.52383 | -1.39646 |
| b5 | 0.0753 | 0.167008 | 0.072192 | 0.1491 | 0.224967 | 0.152487 |
| **Parameter** | **White Spruce** | | | **Trembling Aspen** | | |
| **Manitoba** | **Saskatchewan** | **Alberta and Northwest Territories** | **Manitoba** | **Saskatchewan** | **Alberta and Northwest Territories** |
| a0 | 0.6977 | 1.028894 | 0.860438 | 0.6549 | 0.758908 | 0.790406 |
| a1 | 1.1086 | 0.942483 | 0.995406 | 1.128 | 1.053024 | 1.026943 |
| a2 | 0.9931 | 0.999984 | 0.998493 | 0.993 | 0.996492 | 0.997524 |
| b1 | 0.2342 | 2.162679 | 1.040218 | 0.9223 | −0.148669 | 0.600584 |
| b2 | −0.0653 | −0.52078 | −0.252387 | −0.1311 | 0.067875 | −0.065681 |
| b3 | 0.1814 | 3.553711 | 1.842818 | 0.6458 | −1.892333 | −0.173812 |
| b4 | 0.0491 | −1.922393 | −0.852227 | −0.2967 | 1.009093 | 0.121363 |
| b5 | 0.1233 | 0.154525 | 0.110359 | 0.067 | 0.076416 | 0.063253 |
| **Parameter** | **Lodgepole Pine** | |
| **Saskatchewan** | **Alberta and Northwest Territories** |
| a0 | 0.965401 | 0.897617 |
| a1 | 0.970357 | 0.988518 |
| a2 | 1.000435 | 0.998735 |
| b1 | 1.507149 | 0.675759 |
| b2 | −0.263651 | −0.130313 |
| b3 | 1.450598 | 0.570634 |
| b4 | −0.942382 | −0.275457 |
| b5 | 0.191585 | 0.105403 |

**Table S4.** Number of annual increment observations available for comparison by species and diameter class. Values in the diameter class column represent the largest diameter of tree in that class.

| **Diameter Class (cm)** | **Species** | | | | |
| --- | --- | --- | --- | --- | --- |
| **White Spruce** | **Black Spruce** | **Jack Pine** | **Lodgepole Pine** | **Trembling Aspen** |
| 5 | 436 | 2456 | 305 | 581 | 413 |
| 10 | 324 | 1975 | 374 | 711 | 369 |
| 15 | 340 | 621 | 198 | 505 | 293 |
| 20 | 391 | 154 | 11 | 278 | 168 |
| 25 | 170 | 15 |  | 65 | 143 |
| 30 | 127 |  |  |  | 124 |
| 35 | 147 |  |  |  | 160 |
| 40 | 157 |  |  |  | 134 |
| 45 | 73 |  |  |  | 87 |
| 50 | 20 |  |  |  | 56 |
| 55 |  |  |  |  | 6 |

**References**

1. Klos, R. Ecologically Based Taper Equations for Major Tree Species in Manitoba. Master’s Thesis, Lakehead University, Thunder Bay, ON, Canada, 2004.
2. Huang, S. *Ecologically Based Individual Tree Volume Estimation for Major Alberta Tree Species Report #2 Ecologically Based Individual Tree Height-Diameter Models for Major Alberta Tree Species*; Alberta Sustainable Resource Development, Public Lands and Forests Division: Edmonton, AB, Canada, 1994.
3. Ung, C.H.; Guo, X.J.; Fortin, M. Canadian national taper models. *For. Chron.* **2014**, *89*, 211–224.
4. Kozak, A. A variable-exponent taper equation. *Can. J. For. Res.* **1988**, *18*, 1362–1368.
5. Huang, S. *Ecologically Based Individual Tree Volume Estimation for Major Alberta Tree Species Report #1 Individual Tree Volume Estimation Procedures for Alberta: Methods of Formulation and Statistical Foundations*; Alberta Sustainable Resource Development, Public Lands and Forests Division: Edmonton, AB, Canada, 1994.
6. Gál, J.; Bella, I.E. *New Stem Taper Functions for 12 Saskatchewan Timber Species*; Information Report NOR-X-338;Natural Resources Canada, Canadian Forest Service, Northern Forestry Centre: Edmonton, AB, Canada, 1994.
